# Supplementary material for: Toward Metal- and Catalyst-free Reactions: Deciphering the substituent and external electric field effects on the Diels-Alder reaction between Ethylene and Nitrosoethylene
Source: Research Square preprint supplement (doi:10.21203/rs.3.rs-2631051/v1), 2023-03-02
Supplement: Supplementary file 2 [file ff811bc29f1f069d4313d147.docx]

**SUPPORTING INFORMATION**

**Toward Metal- and Catalyst-free Reactions: Deciphering the substituent and external electric field effects on the Diels-Alder reaction between Ethylene and Nitrosoethylene**

Letícia dos Santos Braga1; Regina Camargo Bevenino2; Daniel Henriques Soares Leal3; Teodorico Castro Ramalho1,4*

1: Department of Chemistry, Federal University of Lavras, Lavras, Brazil.

2: Department of Health Sciences, Federal University of Espírito Santo, São Mateus, Brazil.

3: Institute of Physics and Chemistry, Federal University of Itajubá, Itajubá, Brazil.

4: Department of Chemistry, Faculty of Science, University of Hradec Kralove, Hradec Kralove, Czech Republic.

* **Corresponding Author:**

Teodorico de Castro Ramalho

e-mail: [teo@ufla.br](mailto:teo@ufla.br)

**Supplementary Information**

[Table 1: reactants/TS energies and activation barrier to reaction between ethylene and nitrosoethylene without/with BH3. 1](#_Toc126932335)

[Table 2: reactants/TS energies and activation barrier to reaction between ethylene and nitrosoethylene with electric field applied in x-, y- and z-axis. 1](#_Toc126932336)

[Table 3: reactants/TS energies and activation barrier to reaction between ethylene and nitrosoethylene with Cl/CH3 and F/CH3 substituints and electric field applied in x-, y- and z-axis. 3](#_Toc126932337)

Table 1: reactants/TS energies and activation barrier to reaction between ethylene and nitrosoethylene without/with BH3.

| Single Point | Reactants Energy - this work (Hartree) | | Reactants Energy - base-article (Hartree) |
| --- | --- | --- | --- |
| MP3/6-31G(d) |
| Without BH3 | -285.5796 | | -285.5796 |
| BH3 bonding at oxygen | -312.0787 | | -312.0787 |
| BH3 bonding at nitrogen | -312.0990 | | -312.0989 |
|  |  | |  |
| Single Point | **TS Energy - this work (Hartree)** | | **TS Energy - base-article (Hartree)** |
| MP3/631G(d) |  | |  |
| Without BH3 | -285.5471 | | -285.5471 |
| BH3 bonding at oxygen | -312.0569 | | -312.0568 |
| BH3 bonding at nitrogen | -312.0805 | | -312.0804 |
| Activation Barrier - this work (kcal.mol-1) | | **Activation Barrier - base-article (kcal.mol-1)** | |
| 20.3449 | | 20.3624 | |
| 13.7078 | | 13.7962 | |
| 11.6232 | | 11.6025 | |

Table 2: reactants/TS energies and activation barrier to reaction between ethylene and nitrosoethylene with electric field applied in x-, y- and z-axis.

| Single point | Reactants Energy (Hartree) |
| --- | --- |
| MP3/6-31G(d) | |
| X-Eletric Field value (a.u) |  |
| -0.080 | -285.5764 |
| 0.080 | -285.5760 |
| -0.125 | -285.5410 |
| 0.125 | -285.5760 |
| X-Eletric Field value (a.u) | **TS Energy (Hartree)** |
| MP3/6-31G(d) | |
| -0.080 | -285.5306 |
| 0.080 | -285.5452 |
| -0.125 | -285.5308 |
| 0.125 | -285.5426 |

| Activation Barrier (kcal.mol-1) |
| --- |
| 28.7182 |
| 19.3151 |
| 6.3938 |
| 20.9811 |

| Single point | Reactants Energy (Hartree) |
| --- | --- |
| MP3/631G(d) | |
| Y-Eletric Field value (a.u) |  |
| -80 | -285.57637 |
| 80 | -285.57557 |
| -125 |  |
| 125 | -285.57561 |
| E Eletric Field value (a.u)no | **TS Energy (Hartree)** |
| MP3/631G(d) | |
| -80 | -285.54733 |
| 80 | -285.54687 |
| -125 | -285.54733 |
| 125 | -285.54661 |

| Activation Barrier (kcal.mol-1) |
| --- |
| 18.2201 |
| 18.0074 |
| 18.0344 |
| 18.2000 |

| Single point | Reactants Energy (Hartree) |
| --- | --- |
| MP3/631G(d) | |
| Y-Eletric Field value (a.u) |  |
| -80 | -285.57637 |
| 80 | -285.57557 |
| -125 |  |
| 125 | -285.57561 |
| E Eletric Field value (a.u)no | **TS Energy (Hartree)** |
| MP3/631G(d) | |
| -80 | -285.54733 |
| 80 | -285.54687 |
| -125 | -285.54733 |
| 125 | -285.54661 |

| Single point | Reactants Energy (Hartree) |
| --- | --- |
| MP3/6-31G(d) | |
| Z-Eletric Field value (a.u) |  |
| -0.080 | -285.5762 |
| 0.080 | -285.5861 |
| -0.125 | -285.5760 |
| 0.125 | -285.5756 |
| Z-Eletric Field value (a.u) | **TS Energy (Hartree)** |
| MP3/6-31G(d) | |
| -0.080 | -285.5470 |
| 0.080 | -285.5466 |
| -0.125 | -285.5467 |
| 0.125 | -285.5459 |

| Activation Barrier (kcal.mol-1) |
| --- |
| 18.3186 |
| 24.8302 |
| 18.4103 |
| 18.6625 |

|  |  |
| --- | --- |
| MP3/6-31G(d) | |
| Y-Eletric Field value (a.u) |  |
| -0.080 | -285.57630 |
| 0.080 |  |
| -0.125 | -285.57600 |
| 0.125 |  |
| Y-Eletric Field value (a.u) | **TS Energy (Hartree)** |
| - | |
| -0.080 | -285.54730 |
| 0.080 |  |
| -0.125 | -285.54730 |
| 0.125 |  |

Table 3: reactants/TS energies and activation barrier to reaction between ethylene and nitrosoethylene with Cl/CH3 and F/CH3 substituints and electric field applied in x-, y- and z-axis.

**Cl/CH3**

| Single point energy | Reactants Energy (Hartree) | TS Energy (Hartree) | Activation Barrier (kcal.mol-1) |
| --- | --- | --- | --- |
| Without EEF | -783.7972 | -783.7599 | 23.3857 |
| X- EFF value (a.u) | | | |
| -0.080 | -783.7943 | -783.7592 | 23.0306 |
| 0.080 | -783.7963 | -783.7596 | 22.5317 |
| -0.125 | -783.7941 | -783.7581 | 22.7501 |
| 0.125 | -783.7953 | -783.7590 | 22.7501 |
| Y- EFF value (a.u) | | | |
| -0.080 | -783.7955 | -783.7600 | 22.2813 |
| 0.080 | -783.7947 | -783.7594 | 22.2129 |
| -0.125 | -783.7951 | -783.7598 | 22.2067 |
| 0.125 | -783.8033 | -783.7588 | 27.9282 |
| Z- EFF value (a.u) | | | |
| -0.080 | -783.7945 | -783.7592 | 22.2161 |
| 0.080 | -783.7949 | -783.7596 | 22.1533 |
| -0.125 | -783.7941 | -783.7582 | 22.5455 |
| 0.125 | -783.7999 | -783.7589 | 25.7320 |

F/CH3

| Single point energy | Reactants Energy (Hartree) | TS Energy (Hartree) | Activation Barrier (kcal.mol-1) |
| --- | --- | --- | --- |
| Without EEF | -783.7972 | -783.7599 | 23.3857 |
| X- EFF value (a.u) | | | |
| -0.080 | -423.7710 | -423.7357 | 22.1219 |
| 0.080 | -423.7719 | -423.7364 | 22.2462 |
| -0.125 | -423.7710 | -423.7350 | 22.5380 |
| 0.125 | -423.7705 | -423.7362 | 21.4995 |
| Y- EFF value (a.u) | | | |
| -0.080 | -423.7717 | -423.7369 | 21.8810 |
| 0.080 | -423.7721 | -423.7354 | 22.9766 |
| -0.125 | -423.7731 | -423.7369 | 22.7256 |
| 0.125 | -423.7713 | -423.7346 | 23.0269 |
| Z- EFF value (a.u) | | | |
| -0.080 | -423.7710 | -423.7358 | 22.1012 |
| 0.080 | -423.7710 | -423.7362 | 21.8747 |
| -0.125 | -423.7710 | -423.7351 | 22.5361 |
| 0.125 | -423.7709 | -423.7159 | 34.5554 |
